# Supplementary material
Source: HighWire-hosted journal article supplement (https://tobaccocontrol.bmj.com/content/30/e1/e56)
Supplement: inline-supplementary-material-1 [file inline-supplementary-material-1.pdf]

**WARNING: This product contains nicotine.  
Nicotine is an addictive chemical.**

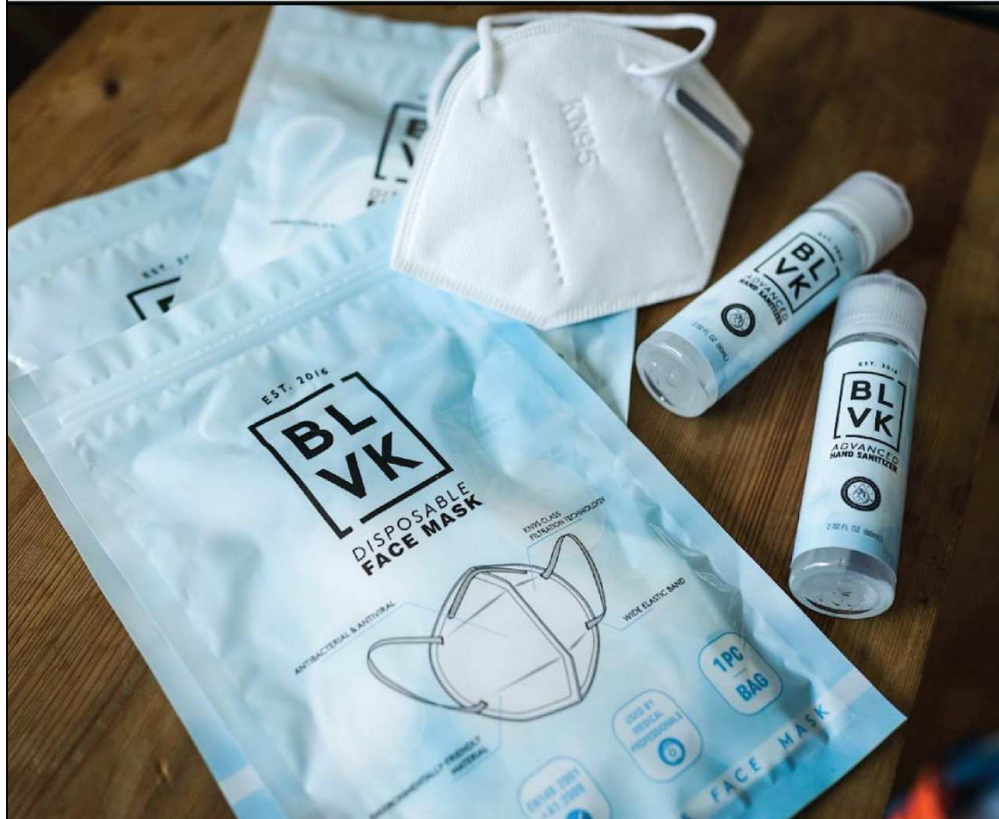

**Supplementary Online Figure 1** :E-liquid manufacturer BLVK Unicorn produced branded essential supplies including hand sanitizers and face masks. The branded products were promoted by the brand through its Instagram channel along with an appeal to “#stayathome with our flavors,” and not leave home without the branded products.
